# Supplementary material
Source: publisher figshare collection journal article supplement (https://future-science-group.figshare.com/ndownloader/files/19249601)
Supplement: Supplementary file 1 [file 19249601]

**SUPPLEMENTARY TABLES**

**Supplementary Table 1**. Results of seven qPCR reactions targeting the plasmids from batch No. 2 with all 13 plasmids for bacterial diarrhea-causing virulence genes as templates at a concentration of 1.5×109 copies/reaction. Bold red italicized type indicates confirmed contamination by Sanger sequencing of the PCR products and subsequent BLAST searches.

| qPCR  target  Reference  plasmid | | Mean Ct ± SD | | | | | | |
| --- | --- | --- | --- | --- | --- | --- | --- | --- |
| *escV* | *sth* | *lt* | *aggR* | *astA* | *pic* | *ipaH* |
| First batch | *stx1* | / | / | / | / | / | / | / |
| *stx2* | / | / | / | / | / | / | / |
| *eae* | / | / | / | / | / | / | / |
| *bfpB* | / | / | / | / | / | / | / |
| *stp* | / | / | / | / | / | / | / |
| *invE* | / | / | / | / | / | / | / |
| Second batch | *escV* | 9.6±0.1 | 20.2±0.1 | ***28.2±0.1*** | 34.1±0.2 | 39.1±0.7 | 33.4±0.4 | 35.3±0.6 |
| *sth* | ***32.5±0.2*** | 9.7±0.1 | 34.4±0.8 | ***33.2±0.4*** | 29.8±0.1 | 33.8±0.2 | 33.1±0.1 |
| *lt* | 33.7±0.1 | 33.8±0.9 | 9.6±0.0 | 32.0±0.2 | 36.5±0.0 | 34.7±0.2 | ***33.5±0.3*** |
| *aggR* | 29.7±0.3 | ***33.2±0.3*** | ***28.4±0.0*** | 9.2±0.1 | 30.6±0.2 | 31.2±0.1 | 28.0±0.2 |
| *astA* | 31.6±0.4 | 33.4±0.1 | 31.3±0.0 | 30.4±0.2 | 13.6±0.7 | ***27.7±0.2*** | 25.9±0.0 |
| *pic* | 30.1±0.2 | 38.2±1.0 | 31.8±0.2 | 28.2±0.1 | ***36.6±0.3*** | 9.0±0.1 | 34.8±0.4 |
| *ipaH* | 28.3±0.5 | 32.5±0.1 | 32.9±0.1 | 33.2±0.1 | 34.0±0.8 | ***29.7±0.1*** | 10.1±0.1 |

**Supplementary Table 2**. *CXCL8* plasmid was contaminated by *IL1B* plasmid purchased at the same time from Supplier B. Template concentration of the qPCR reactions were 1.5×109 copies/reaction.

| qPCR target  Reference plasmid | | Mean Ct ± SD | |
| --- | --- | --- | --- |
| *CXCL8* | *IL1B* |
| Original plasmids | *IL1B* | / | 11.1±0.1 |
| *CXCL8* | 10.6±0.0 | 18.0±0.1 |
| Repurified plasmids | *IL1B* | / | 11.0±0.1 |
| *CXCL8* | 11.0±0.1 | / |

**FIGURE LEGENDS**

**Supplementary Figure 1**. The standard curve graph of HPV18 reference plasmid by CerviHPV assay. In addition to HPV18 amplification signal, unexpected amplification signal appeared in 12HPV channel.
